# Supplementary material for: Valorization of cash crop waste into a decomposable nanocellulose adsorbent matrix through bacterial cell factories for the management of agricultural runoff contaminants
Source: Royal Society of Chemistry journal article supplement (doi:10.1039/d5ra08849f), 2026-01-01
Supplement: d5ra08849f1.pdf [file d5ra08849f1.pdf]

## Supplementary Information

### Valorization of Cash Crop Waste into a decomposable Nanocellulose adsorbent matrix through Bacterial Cell Factories for the Management of Agricultural Runoff Contaminants

Bendangtula Walling<sup>1</sup>, Pranjal Bharali<sup>1\*</sup>, D. Ramachandran<sup>2</sup>, Viswanathan Kanagasabai<sup>2</sup>, Swapnali Hazarika<sup>3</sup>, Nipu Dutta<sup>4</sup>, Panneerselvam Vengatesh<sup>2</sup>, M. Thangam<sup>2</sup>, Shiva Aley Acharjee<sup>1</sup>, Vinita Vishwakarma<sup>5</sup>

<sup>1</sup>Applied Environmental Microbial Biotechnology Laboratory, Department of Environmental Science, Nagaland University, Lumami, Zunheboto-798627, Nagaland, India;

<sup>2</sup>Centre for Nanoscience & Nanotechnology, Sathyabama Institute of Science and Technology, Jeppiaar Nagar, Rajiv Gandhi Road, Chennai-600119, Tamil Nadu, India;

<sup>3</sup>Chemical Engineering Group, CSIR-North East Institute of Science & Technology, Jorhat-785006, Assam, India;

<sup>4</sup>Department of Chemical Science, Tezpur University, Napaam, Tezpur-784028, Assam, India;

<sup>5</sup>Centre for Nanoscience and Nanotechnology, Galgotias University, Greater Noida, NCR Delhi

\*Corresponding Author's mail id: prangenetu@gmail.com

#### Table of Contents

| Sl. No.                       | Content                                                          | Page No. |
|-------------------------------|------------------------------------------------------------------|----------|
| <b>Experimental</b>           |                                                                  |          |
| 1                             | Text S1. Chemicals and Bacterial Strain                          | 2        |
| 2                             | Text S2. Adsorption Capacity and Removal Efficiency Calculations | 2        |
| 3                             | Text S3. Biodegradation % Calculation                            | 2        |
| <b>Results and Discussion</b> |                                                                  |          |
| 4                             | Text S4. Adsorption Kinetics Models                              | 2        |
| 5                             | Text S5. Adsorption Isotherm Models                              | 3        |
| 6                             | Text S6. Thermodynamic Equations for Adsorption                  | 3        |
| <b>Supplementary Figures</b>  |                                                                  |          |
| 7                             | Figure S1. Waste Sugarcane Molasses                              | 4        |
| 8                             | Figure S2. HPLC chromatogram of WSM sugars                       | 4        |
| 9                             | Figure S3. FE-SEM & FTIR analyses of BNC post-adsorption         | 5        |
| 10                            | Figure S4. Effect of parameters on adsorption of TC and 2,4-D    | 6        |
| 11                            | Figure S5. Adsorption kinetics plots                             | 6        |
| 12                            | Figure S6. Adsorption isotherm plots                             | 7        |
| 13                            | Figure S7. FESEM and regeneration study                          | 8        |
| 14                            | Figure S8. Biodegradation study of BNC films                     | 8        |
| <b>Supplementary Tables</b>   |                                                                  |          |
| 15                            | Table S1. BNC production in different beaker types               | 9        |

|    |                                                                   |   |
|----|-------------------------------------------------------------------|---|
| 16 | Table S2. d-spacing and allomorph of BNC from WSM                 | 9 |
| 17 | Table S3(a). Kinetic parameters for TC and 2,4-D adsorption       | 9 |
| 18 | Table S3(b). Isotherm parameters for TC and 2,4-D adsorption      | 9 |
| 19 | Table S3(c). Thermodynamic parameters for TC and 2,4-D adsorption | 9 |
| 20 | Table S4. Weight loss and degradation of BNC films                | 9 |

## Experimental

### Text S1. Chemicals and Bacterial Strain

All reagents were of analytical grade and obtained from Hi Media, India. The Hestrin-Schramm (HS) medium consisted of yeast extract (5 g/L), peptone (5 g/L), disodium hydrogen phosphate (2.7 g/L), and citric acid (1.15 g/L). The 2,4-D compound was obtained from Hi Media, India, while TC was acquired from Tokyo Chemical Industry (TCI), India. *Komagataeibacter saccharivorans* NUWB1, previously isolated from decomposed apple, was used in this study.

### Text S2. Adsorption Capacity and Removal Efficiency Calculations

Batch adsorption experiments assessed the uptake of 2,4-D and TC. BNC was added to Erlenmeyer flasks containing solutions of defined initial concentrations. Mixtures were agitated at controlled temperatures for specific durations. Parameters such as adsorbent dosage, initial pollutant concentration, contact time, pH, and temperature were systematically varied.

Concentrations of 2,4-D and TC before and after adsorption were measured using a UV–visible spectrophotometer (Shimadzu, Japan) at wavelengths of 282 nm (2,4-D) and 357 nm (TC). Experiments were conducted in triplicate. The adsorption capacity ( $q_e$ ) and removal efficiency (R%) were calculated as follows:

$$Removal\ efficiency(\%) = \frac{C_0 - C_e}{C_0} * 100 \quad \text{Eqn. (1)}$$

$$q_e = \frac{(C_0 - C_e)}{m} * V \quad \text{Eqn. (2)}$$

where  $C_0$  is the concentration of the initial pollutant ( $\text{mg L}^{-1}$ ),  $C_e$  is the equilibrium concentration of the pollutant,  $m$  represents the mass (g) of the adsorbent, and  $V(\text{L})$  represents the volume of the adsorbate solution.

### Text S3. Biodegradation % Calculation

$$Biodegradation\ \% = \frac{W_1 - W_2}{W_1} \times 100 \quad \text{Eqn. (3)}$$

$W_1$  signifies the initial weight of the film, and  $W_2$  signifies its final weight of post-degradation.

## Results and Discussion

### Text S4. Adsorption Kinetics Models

The Lagergren pseudo-first-order (PFO) model, originally proposed by Lagergren, is represented by Eqn (4):

$$\text{Log}(q_e - q_t) = \text{Log} q_e - k_1 t \quad \text{Eqn. (4)}$$

The variable  $k_1$  represents the rate constant for the pseudo-first-order, and  $t$  indicates the duration of contact time.

The Ho pseudo-second-order (PSO) kinetic model is shown in Eqn (5):

$$\frac{1}{q_t} = \frac{1}{k_2 q_e} + \frac{t}{q_e} \quad \text{Eqn. (5)}$$

where  $k_2$  is the pseudo-second-order adsorption rate constant

### Text S5. Adsorption Isotherm Models

The Langmuir isotherm is given by Eqn (6):

$$\text{Langmuir isotherm: } \frac{C_e}{q_e} = \frac{1}{Q_{\max} K_L} + \frac{1}{Q_{\max}} C_e \quad \text{Eqn. (6)}$$

$C_e$  (mg L<sup>-1</sup>) represents the concentration of the adsorbate in the solution at equilibrium,  $q_e$  (mg/g) represents the amount of adsorbate adsorbed at equilibrium,  $q_{\max}$  (mg/g) represents the monolayer adsorption capacity,  $K_L$  represents the equilibrium adsorption constant

The Freundlich isotherm is given by Eqn (7):

$$\text{Freundlich isotherm: } \log q_e = \frac{1}{n_F} (\log C_e) + \log K_F \quad \text{Eqn. (7)}$$

here  $K_F$  represents the Freundlich constant,  $n$  represents the intensity of the adsorption.

The Temkin isotherm is given by Eqn (8):

$$\text{Temkin isotherm: } q_e = \frac{RT}{B_T} \ln(A_T C_e) \quad \text{Eqn. (8)}$$

Here, the variation in adsorption energy is  $Q$  (J mol<sup>-1</sup>), and the Temkin constant is  $KT$  (L mg<sup>-1</sup>).

### Text S6. Thermodynamic Equations for Adsorption

The values of  $\Delta H^\circ$  and  $\Delta S^\circ$  were derived from the slope and intercept of the van't Hoff plot of  $\ln K_d$  versus  $1/T$  for the highest initial concentration of TC and 2,4-D using the expression given in Eqn (9).

$$\ln K_d = \frac{\Delta S^\circ}{R} - \frac{\Delta H^\circ}{RT} \quad \text{Eqn. (9)}$$

where  $K_d$  denotes the dimensionless equilibrium distribution coefficient,  $R$  (8.314 J/mol K) denotes the universal gas constant and  $T$  (K) denotes the absolute temperature. The values of  $\Delta G^\circ$  were calculated from Eqn (10).

$$\Delta G^\circ = \Delta H^\circ - T\Delta S^\circ \quad \text{Eqn. (10)}$$

Using equations 10 and 11,  $K_d$  and  $\Delta G^\circ$  were determined.

$$K_d = \frac{q_e}{C_e} \quad \text{Eqn. (11)}$$

$$\Delta G^\circ = \Delta H^\circ - T\Delta S^\circ \quad \text{Eqn. (12)}$$

$K_d$  represents the distribution coefficient,  $q_e$  is the amount of adsorbate retained by the adsorbent per litre of solution at equilibrium,  $C_e$  is the equilibrium concentration of the adsorbate in the solution,  $R$  denotes gas constant (8.314 JK<sup>-1</sup>

$^{\circ}\text{mol}^{-1}$ ), and  $T$  is the absolute temperature.  $\Delta H^{\circ}$  and  $\Delta S^{\circ}$  were computed using the graph that plotted  $\ln(K_d)$  against  $1/T$ .

#### Supplementary Figures

- **Figure S1. Waste Sugarcane Molasses.**

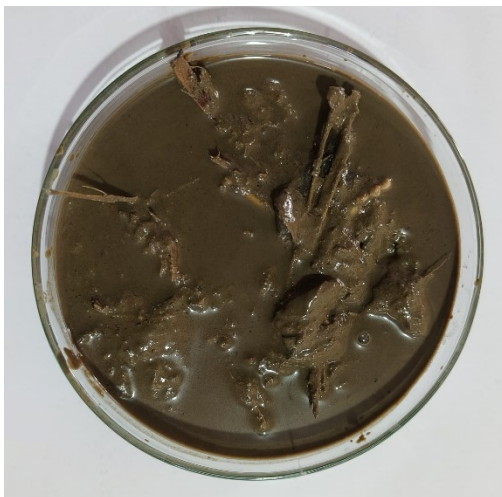

- **Figure S2. HPLC chromatogram showing glucose, fructose, and sucrose in WSM.**

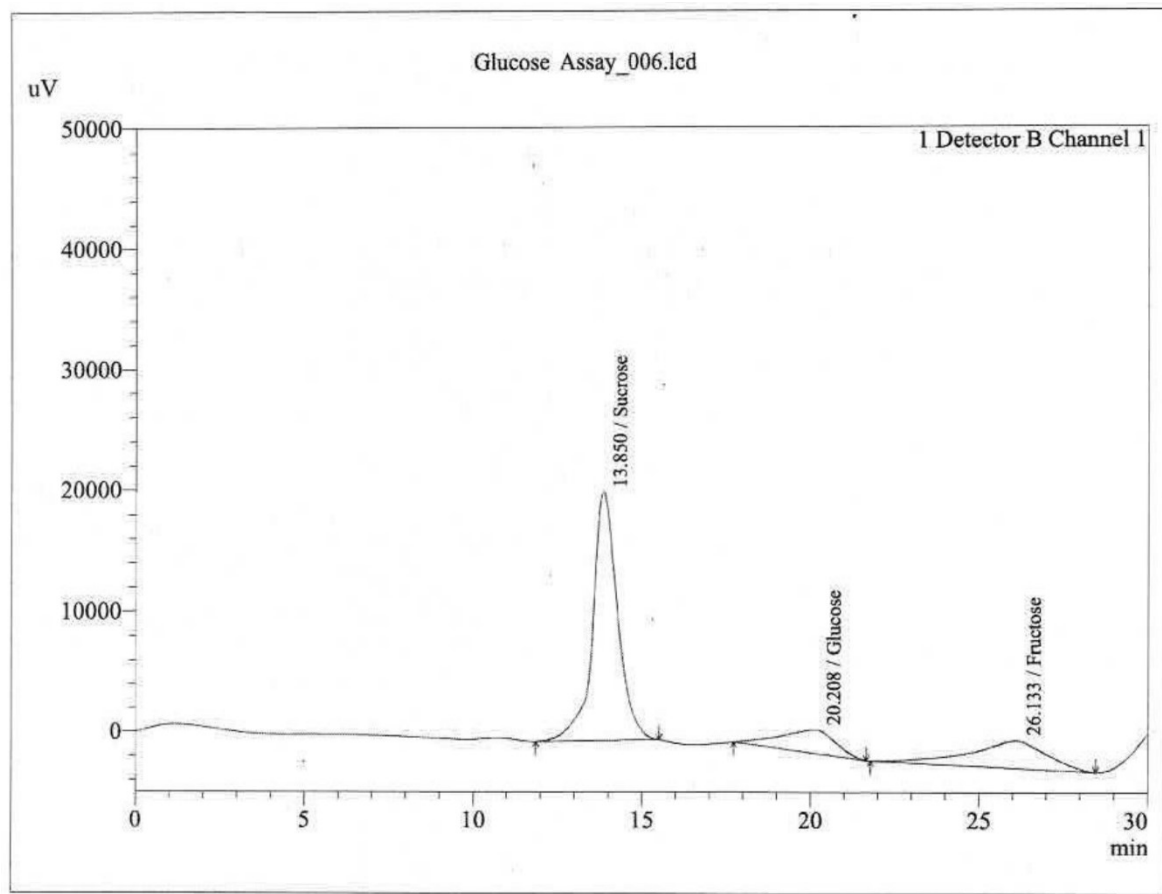

- Figure S3. FE-SEM images of BNC post-adsorption of (a) TC, (b) 2,4-D, and (c) FTIR spectra pre- and post-adsorption.

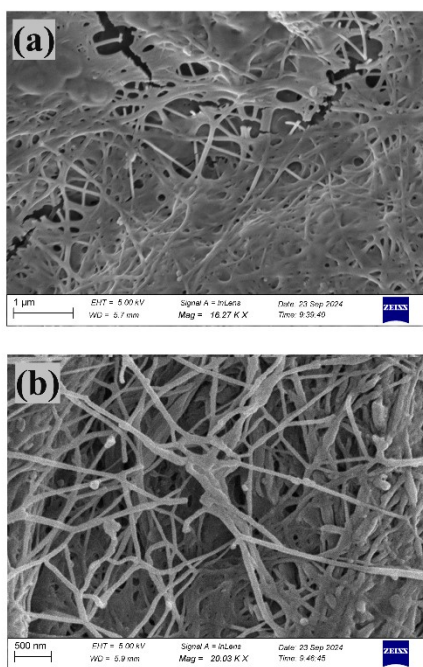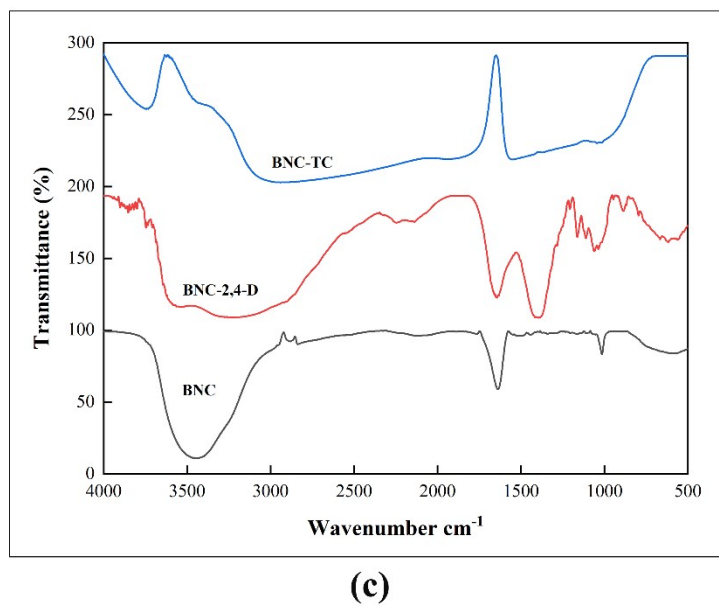

- Figure S4. Effects of (a) dosage, (b) initial concentration, (c) time, (d) pH, and (e) temperature on adsorption of TC and 2,4-D by BNC.

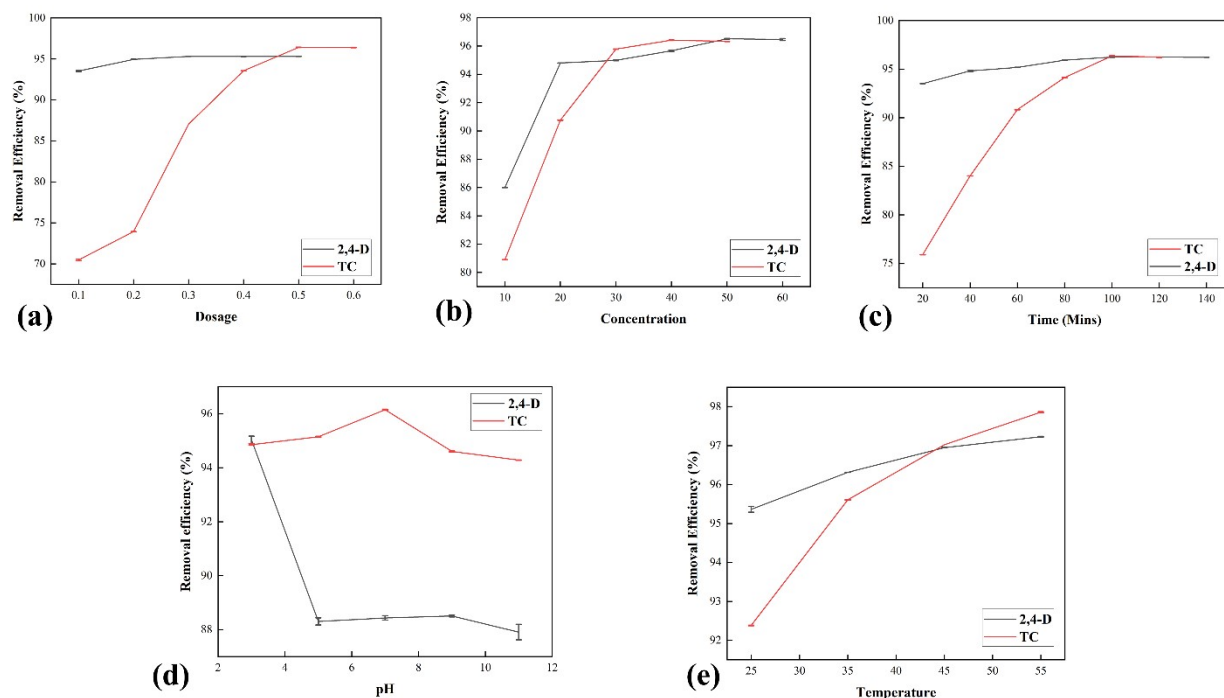

- Figure S5. (a) and (b) Pseudo-first-order for TC and 2,4-D and (c) pseudo-second-order kinetic plots for TC and 2,4-D.

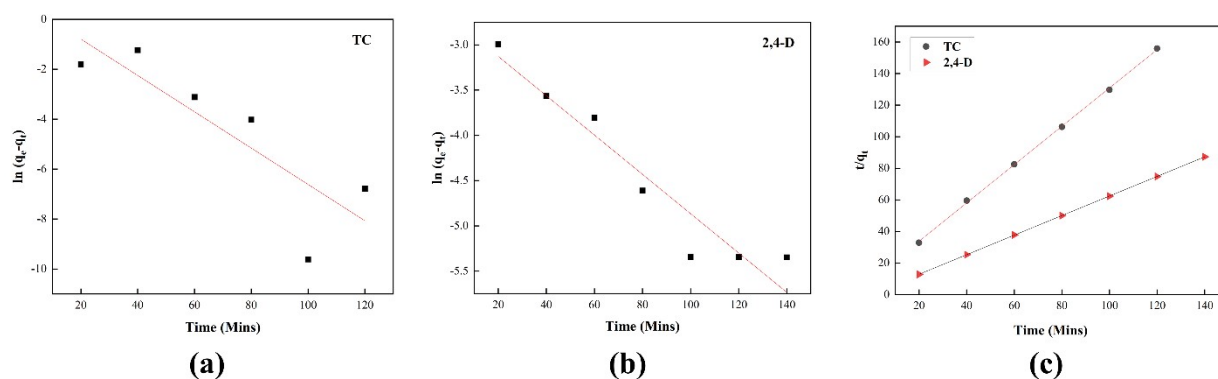

- Figure S6. Langmuir, Freundlich, and Temkin isotherms for TC and 2,4-D adsorption.

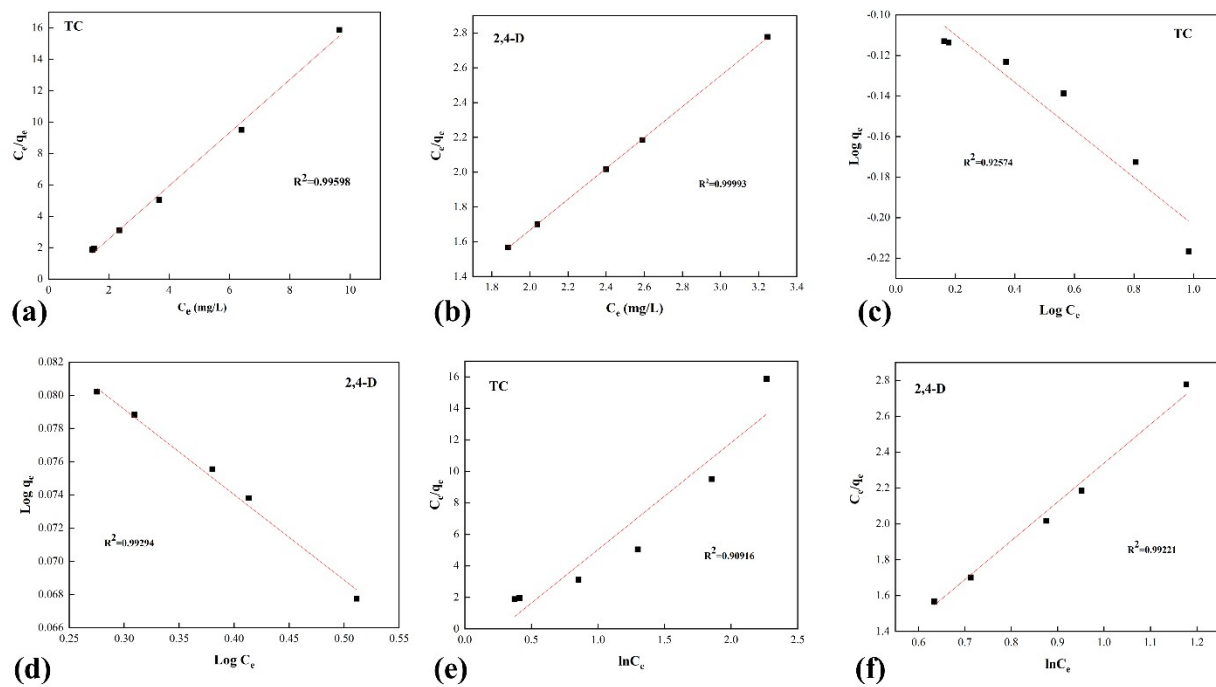

- Figure S7. FE-SEM images of BNC after desorption of (a) TC, (b) 2,4-D, and (c) BNC regeneration cycles.

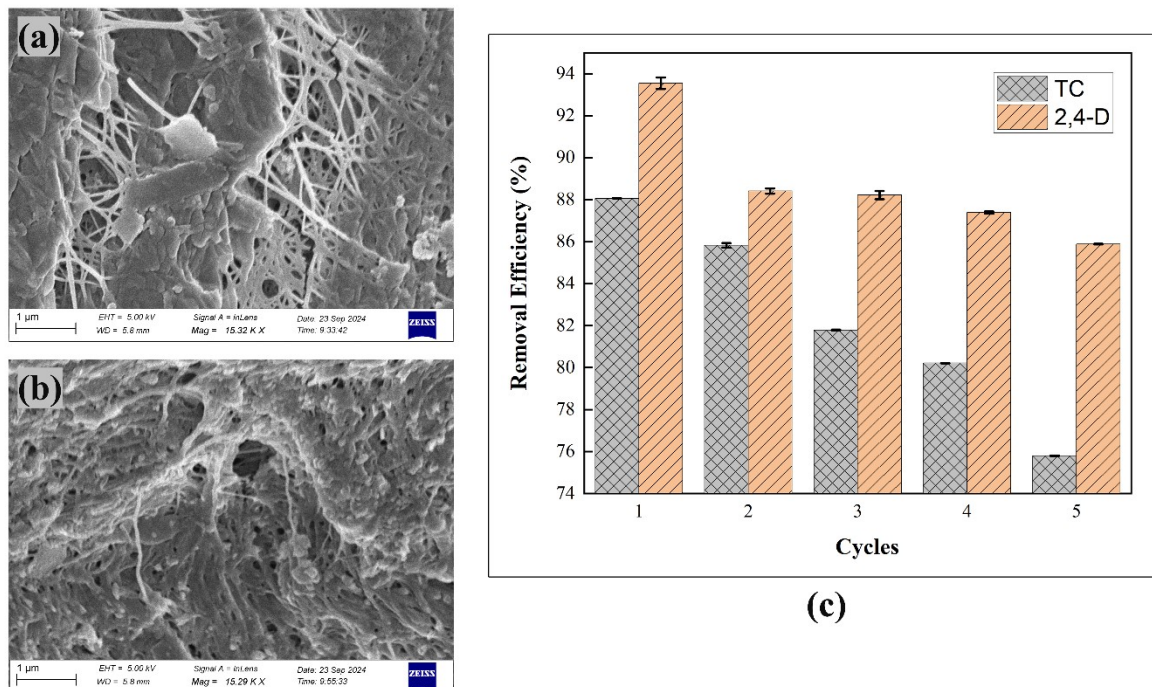

- Figure S8. (a) Morphological changes in BNC films over 21 days of soil burial, and (b) weight loss during degradation.

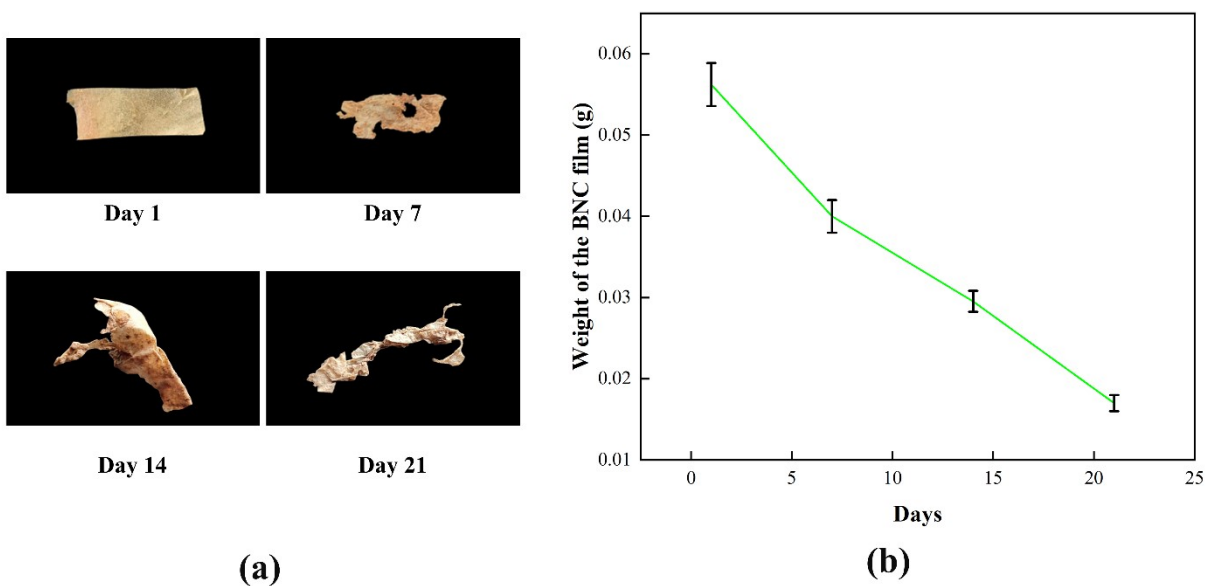

## Supplementary Tables

Table S1. Comparison of BNC production in different beaker types and broth volumes



| Beaker Volume<br>(mL) | Culture Volume<br>(mL) | Surface Area<br>(cm <sup>2</sup> ) | Depth<br>(cm) | S/V Ratio<br>(cm <sup>-1</sup> ) | BNC Production<br>(g) |
|-----------------------|------------------------|------------------------------------|---------------|----------------------------------|-----------------------|
| 500                   | 300                    | 349                                | 6.2           | 1.6                              | 3.279 ± 0.023         |
| 500                   | 200                    | 349                                | 4.1           | 2.69                             | 3.085 ± 0.09          |
| 250                   | 200                    | 220                                | 5.6           | 1.1                              | 1.621 ± 0.014         |
| 250                   | 100                    | 220                                | 3.2           | 2.2                              | 1.77 ± 0.063          |

**Table S2. d-Spacing and Dominant Allomorph of BNC Synthesized from WSM**

| Bacterium               | Carbon Substrate | d <sub>1</sub> (nm) | d <sub>2</sub> (nm) | d <sub>3</sub> (nm) | Dominant Allomorph |
|-------------------------|------------------|---------------------|---------------------|---------------------|--------------------|
| K. saccharivorans NUWB1 | WSM              | 0.601               | 0.515               | 0.385               | 1α                 |

**Table S3(a). Kinetic Parameters for Adsorption of TC and 2,4-D onto BNC**

| Adsorbate | Model            | q <sub>e</sub> (exp) | q <sub>e</sub> (cal) | k        | R <sup>2</sup> |
|-----------|------------------|----------------------|----------------------|----------|----------------|
| TC        | Pseudo-1st Order | 0.771                | 1.51                 | 0.000727 | 0.72           |
| TC        | Pseudo-2nd Order | 0.771                | 0.824                | 0.07     | 0.99           |
| 2,4-D     | Pseudo-1st Order | 1.608                | 0.3713               | 0.00018  | 0.91           |
| 2,4-D     | Pseudo-2nd Order | 1.608                | 1.614                | 5.1379   | 0.99           |

**Table S3(b). Adsorption Isotherm Parameters for TC and 2,4-D on BNC**

| Adsorbates | Langmuir                                        | Freundlich               | Temkin                   |
|------------|-------------------------------------------------|--------------------------|--------------------------|
| TC         | q <sub>max</sub> (mg g <sup>-1</sup> ) = 1.22   | K <sub>F</sub> = 2.44    | b <sub>T</sub> = 6.7869  |
|            | K <sub>L</sub> = 0.072                          | 1/n = 8.524              | K <sub>T</sub> = 1.2944  |
|            | R <sup>2</sup> = 0.995                          | R <sup>2</sup> = 0.92    | R <sup>2</sup> = 0.90    |
| 2,4-D      | q <sub>max</sub> (mg g <sup>-1</sup> ) = 9.3057 | K <sub>F</sub> = 1.24    | b <sub>T</sub> = 2.16528 |
|            | K <sub>L</sub> = 10.488                         | 1/n = 19.447             | K <sub>T</sub> = 1.08344 |
|            | R <sup>2</sup> = 0.99993                        | R <sup>2</sup> = 0.99294 | R <sup>2</sup> = 0.99065 |

**Table S3(c). Thermodynamic Parameters for Adsorption of TC and 2,4-D**

| Adsorbate | $\Delta H^\circ$ (kJ/mol) | $\Delta S^\circ$ (kJ/mol) | $\Delta G^\circ$ (kJ/mol) |          |          |          |
|-----------|---------------------------|---------------------------|---------------------------|----------|----------|----------|
|           |                           |                           | 298(K)                    | 308(K)   | 318(K)   | 328(K)   |
| TC        | 35.916                    | 0.10917                   | -32.5246                  | -33.6163 | -34.708  | -35.7997 |
| 2,4-D     | 14.681                    | 0.04633                   | -13.129                   | -13.5924 | -14.0558 | -14.5192 |

**Table S4. Weight Loss and Biodegradation of BNC Films**

| Day | Film Weight (g) | BNC Degradation (%) |
|-----|-----------------|---------------------|
|-----|-----------------|---------------------|

|    |                    |       |
|----|--------------------|-------|
| 1  | $0.056 \pm 0.0026$ | 0     |
| 7  | $0.04 \pm 0.003$   | 40.58 |
| 14 | $0.029 \pm 0.0012$ | 47.48 |
| 21 | $0.017 \pm 0.001$  | 69.76 |
